# Supplementary material for: Magnesium hydroxide nanoplates: a pH-responsive platform for hydrophobic anticancer drug delivery
Source: Royal Society of Chemistry journal article supplement (doi:10.1039/c3tb20466a), 2013-01-01

## Supplementary Information

### **Magnesium hydroxide nanoplates: a pH-reponsive platform for hydrophobic anticancer drug delivery**

**Mingyi Guo,<sup>a,b</sup> Faheem Muhammad,<sup>a</sup> Aifei Wang,<sup>a</sup> Wenxiu Qi,<sup>d</sup> Nan Wang,<sup>e</sup> Yingjie Guo,<sup>d</sup> Yen Wei,<sup>c</sup> Guangshan Zhu<sup>\*a</sup>**

<sup>a</sup> *State Key Laboratory of Inorganic Synthesis and Preparative Chemistry, Jilin University, Changchun, 130012, P. R. China.*

*E-mail: [zhugs@jlu.edu.cn](mailto:zhugs@jlu.edu.cn); Fax: +86 431 85168331; Tel: 86 431 85168331*

<sup>b</sup> *College of Construction Engineering, Jilin University, Changchun, 130026, P. R. China.*

<sup>c</sup> *Department of Chemistry, Tsinghua University, Beijing, 100084, China.*

<sup>d</sup> *College of Life Science, Jilin University, Changchun, 130012, P. R. China.*

<sup>e</sup> *Department of Radiology, The First Hospital of Jilin University, Norman Bethune College of Medicine, Changchun, 130021, P. R. China.*

**Table S1.** Zeta potential of  $\text{Mg}(\text{OH})_2\text{-NH}_2$  and  $\text{CUR@Mg}(\text{OH})_2\text{-NH}_2$ .

| Materials                                | Zeta Potential (mV) |
|------------------------------------------|---------------------|
| $\text{Mg}(\text{OH})_2\text{-NH}_2$     | $25.4 \pm 1.9$      |
| $\text{CUR@Mg}(\text{OH})_2\text{-NH}_2$ | $-5.67 \pm 0.4$     |

**Figure S1.** In vitro MTT assay of  $\text{Mg}(\text{OH})_2\text{-NH}_2$  with different concentration.

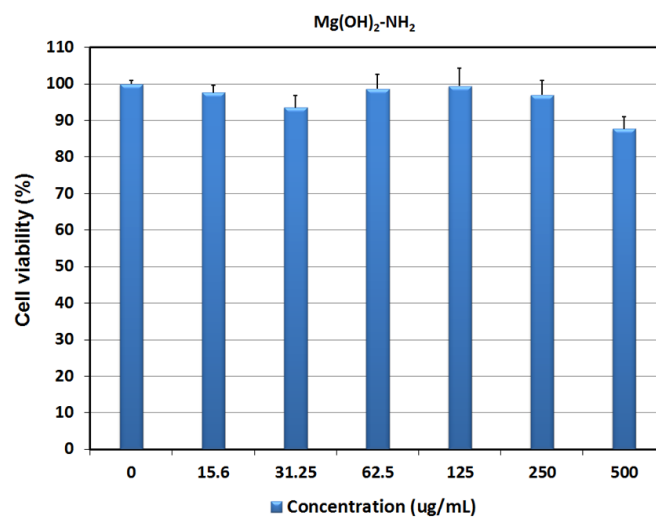

Supplement: c3tb20466a.pdf [file c3tb20466a.pdf]
